# Supplementary material
Source: publisher site journal article supplement (https://www.dovepress.com/article/285744)
Supplement: Supplementary file 1 [file get_supplementary_file.php]

# DHULIKHEL HOSPITAL ED COPD SURVEY

## Demographic Details

\*Required

1. Email address \*

---

2. Patient's Name

---

3. Patient's ID

---

4. Age

---

5. Gender

*Mark only one oval.*

Female

Male

6. District

---

7. Contact number

---

8. Education

*Tick all that apply.*

- No formal education
- school level (1-12)
- High school (>12)

### ED Arrival Characteristics

9. Mode of transport

*Mark only one oval.*

- Ambulance
- Private Vehicle
- Hired Vehicle
- Bike

10. Date of arrival to ED:

---

*Example: 7 January 2019*

11. Time of arrival to ED

---

*Example: 8.30 a.m.*

12. Date of disposition from ED

---

*Example: 7 January 2019*

13. Time of disposition from the ED

---

*Example: 8.30 a.m.*

14. Triage Category

*Mark only one oval.*

Red

Orange

Yellow

Green

Black

15. Triage pulse rate

---

16. Triage respiratory rate

---

17. Triage saturation

---

18. Triage SBP

---

19. Triage DBP

---

20. Triage TPR

---

21. Triage level of consciousness

*Mark only one oval.*

- Alert
- Verbal response
- Pain
- Unresponsive

22.

*Mark only one oval.*

- Option 1

23. Ability to speak

*Mark only one oval.*

- Normal
- Sentences
- Phrases
- None

## Clinical Details

### 24. Cheif Complaints

*Tick all that apply.*

- Dyspnea
- Dry cough,
- Productive cough
- Swelling of limbs,
- Hemoptysis,
- Chest pain,
- fever

Other:  \_\_\_\_\_

### 25. Duration of presenting complaint (days)

\_\_\_\_\_

### 26. Known Co-morbidities:

*Tick all that apply.*

- COPD Asthama
- Ischemic heart disease
- Hypertension
- Diabetes
- congestive Heart failure
- chornic renal disease
- Malignancy
- Depression
- PTB

Other:  \_\_\_\_\_

27. Medication for COPD in last 30 days

*Tick all that apply.*

|                           | oral                     | Inhaled                  | nebulizer                | Injection                |
|---------------------------|--------------------------|--------------------------|--------------------------|--------------------------|
| short acting beta agonist | <input type="checkbox"/> | <input type="checkbox"/> | <input type="checkbox"/> | <input type="checkbox"/> |
| long acting beta agonist  | <input type="checkbox"/> | <input type="checkbox"/> | <input type="checkbox"/> | <input type="checkbox"/> |
| Corticosteroids           | <input type="checkbox"/> | <input type="checkbox"/> | <input type="checkbox"/> | <input type="checkbox"/> |
| Anticholinergics          | <input type="checkbox"/> | <input type="checkbox"/> | <input type="checkbox"/> | <input type="checkbox"/> |
| Methylxanthine Agents     | <input type="checkbox"/> | <input type="checkbox"/> | <input type="checkbox"/> | <input type="checkbox"/> |
| Antibiotics               | <input type="checkbox"/> | <input type="checkbox"/> | <input type="checkbox"/> | <input type="checkbox"/> |
| other                     | <input type="checkbox"/> | <input type="checkbox"/> | <input type="checkbox"/> | <input type="checkbox"/> |

28. Is patient compliant to treatment at home within the last 30 days?

*Mark only one oval.*

Yes

No

29. Smoking

*Mark only one oval.*

Present smoker

Past smoker

Never smoked

30. If patient is a smoker, has smoke exposure been discussed?

*Mark only one oval.*

Yes

No

31. Is patient exposed to wood fire?

*Mark only one oval.*

Yes

No

32. If yes, has indoor household smoke been discussed with the patient?

*Mark only one oval.*

Yes

No

33. Previous visits for the ED for COPD exacerbation?

*Mark only one oval.*

Yes

No

34. If yes, When?

*Mark only one oval.*

- Within last 3 days
- Within last 3-7 days
- Within last 1 month
- Within last 1 year

35. Has patient been admitted to the hospital before?

*Mark only one oval.*

- Yes
- No

36. If yes to hospital admission, where was patient admitted?

*Mark only one oval.*

- Ward
- ICU
- HDU
- Other: \_\_\_\_\_

37. Has patient received pneumococcal or influenza vaccinations?

*Mark only one oval.*

- Yes
- No



38. Is patient on oxygen at home?

*Mark only one oval.*

Yes

No

39. If yes, for how long?

\_\_\_\_\_

40. If yes, what source?

*Mark only one oval.*

Cylinder

O2 concentration

### Course in the ED

41. Investigations sent from ED

*Tick all that apply.*

CBC

RFT

ABG

PEFr

CXR

ECG

Bedside ultrasound

Other:  \_\_\_\_\_

42. If ABG was done, What was the PCO<sub>2</sub>?

\_\_\_\_\_

43. Medications given for treatment of COPD

*Tick all that apply.*

|                           | oral                     | Inhaled                  | nebulizer                | Injection                |
|---------------------------|--------------------------|--------------------------|--------------------------|--------------------------|
| short acting beta agonist | <input type="checkbox"/> | <input type="checkbox"/> | <input type="checkbox"/> | <input type="checkbox"/> |
| long acting beta agonist  | <input type="checkbox"/> | <input type="checkbox"/> | <input type="checkbox"/> | <input type="checkbox"/> |
| Corticosteroids           | <input type="checkbox"/> | <input type="checkbox"/> | <input type="checkbox"/> | <input type="checkbox"/> |
| Anticholinergics          | <input type="checkbox"/> | <input type="checkbox"/> | <input type="checkbox"/> | <input type="checkbox"/> |
| Methylxanthine Agents     | <input type="checkbox"/> | <input type="checkbox"/> | <input type="checkbox"/> | <input type="checkbox"/> |
| Antibiotics               | <input type="checkbox"/> | <input type="checkbox"/> | <input type="checkbox"/> | <input type="checkbox"/> |
| Diuretics                 | <input type="checkbox"/> | <input type="checkbox"/> | <input type="checkbox"/> | <input type="checkbox"/> |
| MGSO <sub>4</sub>         | <input type="checkbox"/> | <input type="checkbox"/> | <input type="checkbox"/> | <input type="checkbox"/> |
| Other                     | <input type="checkbox"/> | <input type="checkbox"/> | <input type="checkbox"/> | <input type="checkbox"/> |

44. Other supportive treatments given in ED

*Tick all that apply.*

- Oxygen
- Bipap
- Mechanical ventilation(intubation)

Other:  \_\_\_\_\_

45. Final Diagnosis

*Tick all that apply.*

- COPD
- Congestive heart failure
- Pneumonia
- Pneumothorax
- Tuberculosis
- lung malignancy
- Pleural effusion

Other:  \_\_\_\_\_

46. Outcome

*Mark only one oval.*

- Mortality in ED
- Admission
- LAMA
- Referred
- Discharged

47. If admitted, which ward?

*Mark only one oval.*

- Ward
- ICU
- HDU

48. Oxygen advised at discharged?

*Mark only one oval.*

Yes

No

49. Discharge Medication

*Tick all that apply.*

|                           | oral                     | Inhaled                  | nebulizer                | Injection                |
|---------------------------|--------------------------|--------------------------|--------------------------|--------------------------|
| short acting beta agonist | <input type="checkbox"/> | <input type="checkbox"/> | <input type="checkbox"/> | <input type="checkbox"/> |
| long acting beta agonist  | <input type="checkbox"/> | <input type="checkbox"/> | <input type="checkbox"/> | <input type="checkbox"/> |
| Corticosteroids           | <input type="checkbox"/> | <input type="checkbox"/> | <input type="checkbox"/> | <input type="checkbox"/> |
| Anticholinergics          | <input type="checkbox"/> | <input type="checkbox"/> | <input type="checkbox"/> | <input type="checkbox"/> |
| Methylxanthine Agents     | <input type="checkbox"/> | <input type="checkbox"/> | <input type="checkbox"/> | <input type="checkbox"/> |
| Antibiotics               | <input type="checkbox"/> | <input type="checkbox"/> | <input type="checkbox"/> | <input type="checkbox"/> |
| Diuretics                 | <input type="checkbox"/> | <input type="checkbox"/> | <input type="checkbox"/> | <input type="checkbox"/> |
| Other                     | <input type="checkbox"/> | <input type="checkbox"/> | <input type="checkbox"/> | <input type="checkbox"/> |

### Quality Improvement Questions

50. Was patient given education on how to administer inhaled medications in ED?

*Mark only one oval.*

Yes

No

51. Was spirometry used in diagnosis of COPD?

*Mark only one oval.*

Yes

No

52. Was patient given education on when to return to ED?

*Mark only one oval.*

Yes

No

53. Was a COPD written action plan given?

*Mark only one oval.*

Yes

No

54. Was patient advised for vaccinations in the ED?

*Mark only one oval.*

Yes

No

55. Does patient have an expected follow up?

*Mark only one oval.*

Yes

No

---

This content is neither created nor endorsed by Google.

Google Forms
